# Supplementary material for: Leucocyte Abnormalities in Synovial Fluid of Degenerative and Inflammatory Arthropathies
Source: MDPI journal article supplement (doi:10.3390/ijms24065450), 2023-03-13
Supplement: s1 [file s1]

## Supplementary Materials

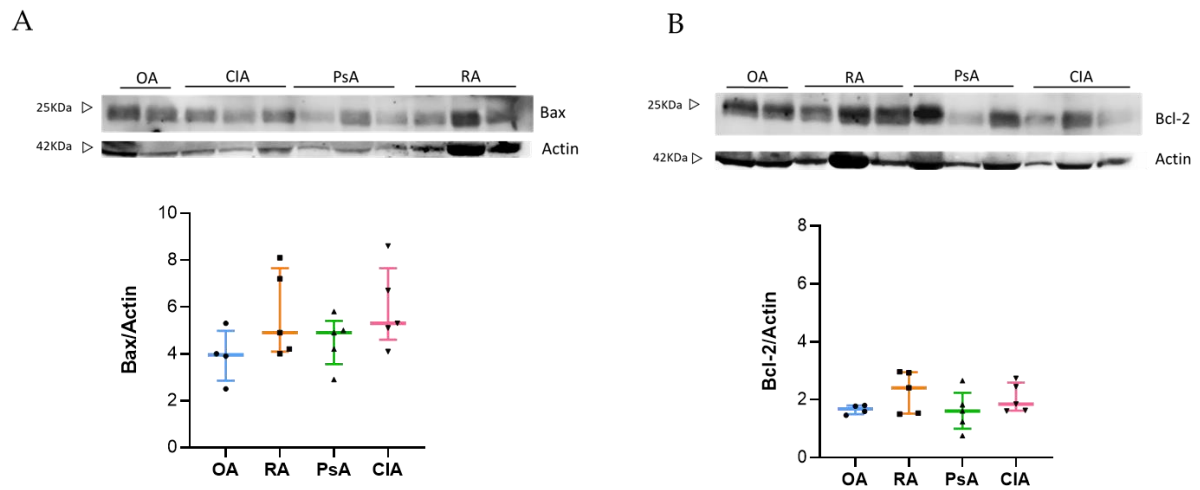

**Figure S1. Bax and Bcl-2 levels in SFs from OA, RA, PsA, and CIA patients.** *Upper panels:* Representative Western blot showing (A) Bax and (B) Bcl-2 immunodetection. Actin was used as a loading control. *Lower panels:* Densitometric analysis of bands, normalized to actin levels. Data are expressed as the median and interquartile range (IQR). P calculated according to the Kruskal–Wallis test. Dunn’s post hoc test: ns. Abbreviations are as follows: OA, osteoarthritis; RA, rheumatoid arthritis; PsA, psoriatic arthritis; CIA, crystal-induced arthritis. ns, not significant.

**Table S1. Micronucleus frequencies in SF leukocytes from OA (n = 7), RA (n = 6), PsA (n = 12), and CIA (n = 10) patients.**

|             | OA  | RA            | PsA             | CIA             | p     |
|-------------|-----|---------------|-----------------|-----------------|-------|
| MN, % (IQR) | 0.0 | 0.0 (0.0-0.8) | 0.9 (0.1-2.4) * | 0.8 (0.5-3.0) * | 0.006 |

Data are expressed as the median and interquartile range (IQR). P calculated according to the Kruskal–Wallis test. Dunn’s post hoc test: \*p<0.05 vs OA. Abbreviations are as follows: OA, osteoarthritis; RA, rheumatoid arthritis; PsA, psoriatic arthritis; CIA, crystal-induced arthritis; IQR, interquartile range.

**Table S2. Cell death rates of leukocyte cells in SF from OA (n = 7), RA (n = 6), PsA (n = 12), and CIA patients (n = 10).**

|                              | OA            | RA              | PsA           | CIA            | p     |
|------------------------------|---------------|-----------------|---------------|----------------|-------|
| Pyknotic cells, % (IQR)      | 0.0 (0.0-1.0) | 9.2 (2.0-20) *  | 3.2 (0.7-5.0) | 8.2 (3.5-14) ° | 0.002 |
| Karyorrhectic cells, % (IQR) | 0.0           | 0.5 (0.0-2.2) * | 0.0 §         | 0.0 (0.0-0.5)  | 0.02  |
| Karyolytic cells, % (IQR)    | 0.0           | 3.0 (0.9-5.4) * | 0.0 (0.0-0.7) | 0.8 (0.0-1.1)  | 0.03  |
| Cell death, % (IQR)          | 0.0 (0.0-1.0) | 15 (3.1-27)     | 4.2 (1.1-7.0) | 8.6 (3.5-18)   | 0.002 |

Data are expressed as the median and interquartile range (IQR). P calculated according to the Kruskal–Wallis test. Dunn’s post hoc test: \*p<0.05, °p<0.01 vs OA; §p<0.05 vs RA. Abbreviations are as follows: OA, osteoarthritis; RA, rheumatoid arthritis; PsA, psoriatic arthritis; CIA, crystal-induced arthritis.

**Table S3. Apoptotic gene expression in SFs from OA (n = 7), RA (n = 6), PsA (n = 12), and CIA (n = 10) patients.**

|                                | OA                     | RA                     | PsA                    | CIA                      | p     |
|--------------------------------|------------------------|------------------------|------------------------|--------------------------|-------|
| BAX, 2 <sup>-ΔCt</sup> (IQR)   | 0.004 (0.004-0.0097)   | 0.015 (0.011-0.024)    | 0.0098 (0.007-0.012)   | 0.019 (0.014-0.022) *    | 0.005 |
| BCL-2, 2 <sup>-ΔCt</sup> (IQR) | 0.0031 (0.0006-0.0057) | 0.0035 (0.0033-0.0038) | 0.0045 (0.0039-0.0047) | 0.0041 (0.0049-0.0079) * | 0.03  |
| BAK, 2 <sup>-ΔCt</sup> (IQR)   | 0.25 (0.18-0.38)       | 0.28 (0.25-0.29)       | 0.29 (0.27-0.30)       | 0.27 (0.24-0.29)         | ns    |
| BAD, 2 <sup>-ΔCt</sup> (IQR)   | 0.0024 (0.0015-0.0033) | 0.0018 (0.0016-0.0029) | 0.0019 (0.0015-0.0032) | 0.0023 (0.0018-0.0034)   | ns    |
| BID, 2 <sup>-ΔCt</sup> (IQR)   | 0.0025 (0.0011-0.0024) | 0.0018 (0.0010-0.0024) | 0.0003 (0.0003-0.0081) | 0.0004 (0.00024-0.0007)  | ns    |

Data are expressed as the median and interquartile range (IQR), and P is calculated according to the Kruskal–Wallis test. Dunn’s post hoc test: \*p<0.05 vs OA. Abbreviations are as follows: OA, osteoarthritis; RA, rheumatoid arthritis; PsA, psoriatic arthritis; CIA, crystal-induced arthritis; ns, not significant.

**Table S4.** Caspase-3 activity determined in selected SFs (n = 5).

|                           | OA             | RA                 | PsA                | CIA               | p    |
|---------------------------|----------------|--------------------|--------------------|-------------------|------|
| <b>CASPASE 3 ACTIVITY</b> | 0.0 (0.0-0.20) | 0.23 (0.23-0.51) * | 0.005 (0.0-0.12) § | 0.11 (0.093-0.13) | 0.02 |

Data are expressed as the median and interquartile range (IQR), and P is calculated according to the Kruskal–Wallis test. Dunn’s post hoc test: \*p<0.05 vs OA, §p<0.05 vs RA. Abbreviations are as follows: OA, osteoarthritis; RA, rheumatoid arthritis; PsA, psoriatic arthritis; CIA, crystal-induced arthritis.
